# Supplementary material
Source: Springer Nature journal article supplement (https://www.springermedizin.de/resource/supplementary/12936_2007_379_MOESM3_ESM.pdf/9547676)
Supplement: MOESM3 [file 9547676]

## **Quality control from nurses' perspectives : selected quotes**

- *“our results did not correlate with the patients signs and symptoms”*
- *“our results did not correlate with the lab findings”*
- *“unsure of a negative results”*
- *“we find it positive they (lab) find it negative”*
- *“clinically suspected cases were negative on RDT but positive in the hospital”*

## **Quality control from the perspective of researchers and malaria control programme managers**

- *“Accuracy of the test, we are not getting the required level of sensitivity”*
- *“No commercial control is available”*
- *“we are concerned about the stability of the quality control specimen”*
- *“ the key challenges are operator level efficiency, quality of the actual test, training instruction in the tests itself and performance of the test in the field”*
- *“Finding the right specimens and sources of the specimens for quality control, poses a huge challenge”*
- *“it is difficult to try to tease out what the problem really is in doing the test, ensure that the variables are all the same when testing proficiency.”*
- *sometimes smears are done in parallel with the RDT and sometimes there is discrepancy.”*
